# Supplementary material
Source: PubMed Central journal article supplement (PMC2776462)
Supplement: 0907396106_0907396106SI.pdf [file 0907396106_0907396106SI.pdf]

# Supporting Information

Wright et al. 10.1073/pnas.0907396106

## SI Materials and Methods

**Antibodies.** Anti-V $\alpha$ 2-PE, anti-V $\beta$ 5.1/5.2-FITC, anti-CTLA-4(CD152)-PE (clone BN13), and anti-IL17A-PE were purchased from BD PharMingen. For intracellular cytokine staining cells were stimulated overnight with PMA (50 ng/mL) and ionomycin (500 ng/mL) with the addition of Golgi-plug (BD) for the final 4 h of incubation. For analysis, cells were fixed (1% paraformaldehyde) and permeabilized (0.5% saponin). Anti-CD25-PE (clone PC-61), anti-CD4-APC.AlexaFlour750 (clone RM4-5), anti-Thy1.1(CD90.1)-PE.Cy7 (clone HIS51), and FoxP3-APC (clone FKJ-16s) were purchased from eBioscience (Insight Biotechnology). Intracellular FoxP3 staining was carried out as per the supplied protocol. Anti-glucocorticoid-induced tumor necrosis factor receptor (GITR)-PE was purchased from R&D Systems.

**Retroviral Vectors.** pMX-OTII $\alpha$ .IRES.OTII $\beta$ , pMP71-OTII $\alpha$ .P2A.OTII $\beta$ , and pMP71-FoxP3.F2A.OTII $\alpha$ .P2A.OTII $\beta$

were generated. pMP71 vectors were modified for optimal gene (and surface TCR) expression by codon optimization and addition of an engineered cysteine bond between the TCR chains [as previously described (1)].

**Peptides and DC Pulsing.** DCs were pulsed for 1–2 h in standard tissue culture media (RPMI 1640 supplemented with 10% heat inactivated Fetal bovine serum) with saturating amounts (100  $\mu$ M) of synthetic peptide. DCs were washed and re-counted before stimulations. Peptides were generated by ProImmune and were: Ova323–339–ISQAVHAAHAEINEAGR (OTII-TCR cognate peptide–presented by I-Ab); NP366–379–ASNEN-DAM (F5-TCR cognate peptide), and Ova265–280–TEWTSS-NVMEERKIKV (irrelevant peptide–presented by I-Ab).

1. Thomas S, et al. (2007) Targeting the Wilms tumor antigen 1 by TCR gene transfer: TCR variants improve tetramer binding but not the function of gene modified human T cells. *J Immunol* 179:5803–5810.
